# Supplementary material for: Genetic and clinical characteristics of primary and secondary glioblastoma is associated with differential molecular subtype distribution
Source: PubMed Central journal article supplement (PMC4466687; doi:10.18632/oncotarget.3440), 2015-01-31
Supplement: oncotarget-06-7318-s001.pdf [file oncotarget-06-7318-s001.pdf]

## Genetic and clinical characteristics of primary and secondary glioblastoma is associated with differential molecular subtype distribution

### Supplementary Material

**Table S1: Gene sets (TOP 15) enriched in pGBM**

|    | NAME                                                 | ES   | NES  | NOM<br>p-val | FDR<br>q-val |
|----|------------------------------------------------------|------|------|--------------|--------------|
| 1  | DEFENSE_RESPONSE                                     | 0.55 | 2.88 | 0            | 0            |
| 2  | RESPONSE_TO_WOUNDING                                 | 0.56 | 2.78 | 0            | 0            |
| 3  | INFLAMMATORY_RESPONSE                                | 0.59 | 2.75 | 0            | 0            |
| 4  | RESPONSE_TO_EXTERNAL_STIMULUS                        | 0.49 | 2.6  | 0            | 0            |
| 5  | IMMUNE_RESPONSE                                      | 0.5  | 2.57 | 0            | 0            |
| 6  | LOCOMOTORY_BEHAVIOR                                  | 0.57 | 2.53 | 0            | 0            |
| 7  | CYTOKINE_METABOLIC_PROCESS                           | 0.66 | 2.52 | 0            | 0            |
| 8  | CYTOKINE_BIOSYNTHETIC_PROCESS                        | 0.67 | 2.52 | 0            | 0            |
| 9  | CYTOKINE_PRODUCTION                                  | 0.59 | 2.51 | 0            | 0            |
| 10 | REGULATION_OF_CYTOKINE_BIOSYNTHETIC_PROCESS          | 0.68 | 2.5  | 0            | 0            |
| 11 | IMMUNE_SYSTEM_PROCESS                                | 0.46 | 2.42 | 0            | 0            |
| 12 | POSITIVE_REGULATION_OF_CYTOKINE_BIOSYNTHETIC_PROCESS | 0.69 | 2.34 | 0            | 0            |
| 13 | PROTEIN_SECRETION                                    | 0.67 | 2.34 | 0            | 0            |
| 14 | CYTOKINE_SECRETION                                   | 0.79 | 2.32 | 0            | 0            |
| 15 | POSITIVE_REGULATION_OF_SIGNAL_TRANSDUCTION           | 0.49 | 2.27 | 0            | 0            |

**Table S2: Gene sets (TOP 15) enriched in sGBM**

|    | <b>NAME</b>                                                | <b>ES</b> | <b>NES</b> | <b>NOM<br/>p-val</b> | <b>FDR<br/>q-val</b> |
|----|------------------------------------------------------------|-----------|------------|----------------------|----------------------|
| 1  | CHROMOSOME_ORGANIZATION_AND_BIOGENESIS                     | -0.57     | -2.53      | 0                    | 0                    |
| 2  | CELL_CYCLE_PROCESS                                         | -0.52     | -2.51      | 0                    | 0                    |
| 3  | ESTABLISHMENT_AND_OR_MAINTENANCE_OF_CHROMATIN_ARCHITECTURE | -0.6      | -2.5       | 0                    | 0                    |
| 4  | RNA_PROCESSING                                             | -0.52     | -2.47      | 0                    | 0                    |
| 5  | MRNA_PROCESSING_GO_0006397                                 | -0.6      | -2.46      | 0                    | 0                    |
| 6  | MRNA_METABOLIC_PROCESS                                     | -0.58     | -2.46      | 0                    | 0                    |
| 7  | M_PHASE                                                    | -0.55     | -2.45      | 0                    | 0                    |
| 8  | CELL_CYCLE_GO_0007049                                      | -0.47     | -2.42      | 0                    | 0                    |
| 9  | MITOSIS                                                    | -0.57     | -2.42      | 0                    | 0                    |
| 10 | M_PHASE_OF_MITOTIC_CELL_CYCLE                              | -0.56     | -2.38      | 0                    | 0                    |
| 11 | CELL_CYCLE_PHASE                                           | -0.5      | -2.37      | 0                    | 0                    |
| 12 | MITOTIC_CELL_CYCLE                                         | -0.51     | -2.36      | 0                    | 0                    |
| 13 | MICROTUBULE_CYTOSKELETON_ORGANIZATION_AND_BIOGENESIS       | -0.67     | -2.36      | 0                    | 0                    |
| 14 | CHROMATIN_ASSEMBLY_OR_DISASSEMBLY                          | -0.71     | -2.35      | 0                    | 0                    |
| 15 | RNA_SPLICING                                               | -0.54     | -2.29      | 0                    | 0                    |
